# Supplementary material
Source: HighWire-hosted journal article supplement (https://bmjopen.bmj.com/content/13/9/e071493)
Supplement: inline-supplementary-material-1 [file inline-supplementary-material-1.pdf]

# Appendix 1. Diagram for recruiting and conducting interventions and evaluations according to SPIRIT Guidelines

| STUDY PERIOD               |           |            |                                                                                      |       |           |
|----------------------------|-----------|------------|--------------------------------------------------------------------------------------|-------|-----------|
|                            | Enrolment | Allocation | Post-Allocation                                                                      |       | Close-out |
| Timepoint                  | $-t_1$    | 0          | $t_1$                                                                                | $t_2$ | $t_3$     |
| <b>ENROLMENT</b>           |           |            |                                                                                      |       |           |
| Eligibility screen         | X         |            |                                                                                      |       |           |
| Informed consent           | X         |            |                                                                                      |       |           |
| Demographic characteristic | X         |            |                                                                                      |       |           |
| Allocation                 |           | X          |                                                                                      |       |           |
| <b>INTERVENTIONS:</b>      |           |            |                                                                                      |       |           |
| PNE interventions          |           |            |   |       |           |
| Control (usual care)       |           |            |  |       |           |
| <b>ASSESSMENTS:</b>        |           |            |                                                                                      |       |           |
| Baseline                   |           | X          |                                                                                      |       |           |
| Primary pain measures      |           | X          |                                                                                      | X     |           |
| Secondary variables        |           | X          |                                                                                      | X     |           |
| Statistical Analysis       |           |            |                                                                                      |       | X         |

t1 Initial evaluation

t2 After 10 weeks
